# Supplementary material for: Effectiveness of Inactivated COVID-19 Vaccines against Delta-Variant COVID-19: Evidence from an Outbreak in Inner Mongolia Autonomous Region, China
Source: MDPI journal article supplement (doi:10.3390/vaccines11020292), 2023-01-28
Supplement: s1 [file s1]

## Supplementary file

**Table S1. Characteristics of all investigated close contacts by COVID-19 vaccination history (No., %)**

| Age(years) | Total | 0-doses    | 1-dose      |            |          | 2-dose    |            |             |             | 3-dose    |             |
|------------|-------|------------|-------------|------------|----------|-----------|------------|-------------|-------------|-----------|-------------|
|            |       |            | 0-14 days * | 15-90 days | >90 days | 0-14 days | 15-90 days | 91-180 days | >180 days   | 0-6 days  | ≥7 days     |
| Total      | 10788 | 644        | 761         | 128        | 68       | 16        | 605        | 4455        | 2168        | 388       | 1555        |
| 3-11       | 1028  | 227 (22.1) | 733 (71.3)  | 68 (6.6)   | 0 (0)    | 0 (0)     | 0 (0)      | 0 (0)       | 0 (0)       | 0 (0)     | 0 (0)       |
| 12-17      | 896   | 14 (1.6)   | 25 (2.8)    | 14 (1.6)   | 6 (0.7)  | 6 (0.7)   | 163 (18.2) | 668 (74.6)  | 0 (0)       | 0 (0)     | 0 (0)       |
| 18-59      | 7740  | 248 (3.2)  | 1 (0)       | 39 (0.5)   | 55 (0.7) | 9 (0.1)   | 309 (4)    | 3150 (40.7) | 2064 (26.7) | 364 (4.7) | 1501 (19.4) |
| ≥60        | 1124  | 155 (13.8) | 2 (0.2)     | 7 (0.6)    | 7 (0.6)  | 1 (0.1)   | 133 (11.8) | 637 (56.7)  | 104 (9.3)   | 24 (2.1)  | 54 (4.8)    |
| Positive   | 503   | 39         | 14          | 7          | 4        | 0         | 30         | 269         | 97          | 7         | 36          |
| 3-11       | 24    | 7 (29.2)   | 13 (54.2)   | 4 (16.7)   | 0 (0)    | 0 (0)     | 0 (0)      | 0 (0)       | 0 (0)       | 0 (0)     | 0 (0)       |
| 12-17      | 104   | 1 (1)      | 0 (0)       | 0 (0)      | 1 (1)    | 0 (0)     | 12 (11.5)  | 90 (86.5)   | 0 (0)       | 0 (0)     | 0 (0)       |
| 18-59      | 290   | 12 (4.1)   | 1 (0.3)     | 2 (0.7)    | 3 (1)    | 0 (0)     | 12 (4.1)   | 133 (45.9)  | 85 (29.3)   | 7 (2.4)   | 35 (12.1%)  |
| ≥60        | 85    | 19 (22.4)  | 0 (0)       | 1 (1.2)    | 0 (0)    | 0 (0)     | 6 (7.1)    | 46 (54.1)   | 12 (14.1)   | 0 (0)     | 1 (1.2)     |
| Negative   | 10285 | 605        | 747         | 121        | 64       | 16        | 575        | 4186        | 2071        | 381       | 1519        |
| 3-11       | 1004  | 220 (21.9) | 720 (71.7)  | 64 (6.4)   | 0 (0)    | 0 (0)     | 0 (0)      | 0 (0)       | 0 (0)       | 0 (0)     | 0 (0)       |
| 12-17      | 792   | 13 (1.6)   | 25 (3.2)    | 14 (1.8)   | 5 (0.6)  | 6 (0.8)   | 151 (19.1) | 578 (73)    | 0 (0)       | 0 (0)     | 0 (0)       |
| 18-59      | 7450  | 236 (3.2)  | 0 (0)       | 37 (0.5)   | 52 (0.7) | 9 (0.1)   | 297 (4)    | 3017 (40.5) | 1979 (26.6) | 357 (4.8) | 1466 (19.7) |
| ≥60        | 1039  | 136 (13.1) | 2 (0.2)     | 6 (0.6)    | 7 (0.7)  | 1 (0.1)   | 127 (12.2) | 591 (56.9)  | 92 (8.9)    | 24 (2.3)  | 53 (5.1)    |

\* Values in this row are time in days between the last vaccine dose and exposure to SARS-CoV-2.
